# Supplementary material for: LRA0401/ LRB0402 protocols for newly diagnosed patients with low-risk embryonal rhabdomyosarcoma based on the central pathological review system: The first report from the Japan Rhabdomyosarcoma Study Group
Source: Research Square preprint supplement (doi:10.21203/rs.3.rs-3838227/v1), 2024-01-12
Supplement: Supplementary file 1 [file dc420aa09b4f6835755f2d13.docx]

SUPPLEMENTARY MATERIAL

**LRA0401/ LRB0402 protocols for newly diagnosed patients with low-risk embryonal rhabdomyosarcoma based on the central pathological review system: The first report from the Japan Rhabdomyosarcoma Study Group**

Hajime Hosoi 1, 23,276, Hiroshi Hojo 2, 23, Mitsuru Miyachi 1, 23, Hajime Okita 3, 23, Jun-Ichi Hata 4, 23, Isao Yokota 5, 6, 23, Satoshi Teramukai 5, 23, 24, Satomi Sakabayashi 5, Miho Kato7, Tetsuya Takimoto 7, Kunihiko Tsuchiya 1, 23, Yasumichi Kuwahara 1, 23, Rie Onodera8, 24, 25Kotone Matsuyama8, 26, Minori Hamasaki 9, 23, Masazumi Tsuneyoshi 10, 23, Yoshinao Oda 10,232, Atsuko Nakazawa 11, 23, Keizo Horibe 12, 23, Jun-Ichi Hara 13,232, Sachiyo Suita 14, 23, Ryoji Hanada 15, 23, Hidekazu Masaki 16, 23, Miwako Nozaki 17, 23, Hitoshi Ikeda 18, 23, Seiji Kishimoto 19, 23, Michio Kaneko 20, 23, Akira Kawai 21, 23, and Yasuhide Morikawa 22, 23

1 Department of Pediatrics, Graduate School of Medical Science, Kyoto Prefectural University of Medicine (KPUM), Kyoto Japan

2 Department of Diagnostic Pathology, Fukushima Medical University, School of Medicine, Fukushima, Japan

3 Department of Pathology, Keio University, Tokyo, Japan

4 Central Institute for Experimental Medicine and Life Science, Kanagawa, Japan5 Department of Biostatistics, Graduate School of Medical Science, Kyoto Prefectural University of Medicine, Kyoto, Japan

6 Department of Biostatistics, Hokkaido University Graduate School of Medicine, Sapporo, Japan.

7 Childhood Cancer Center, National Center for Child Health and Development, Tokyo, Japan

8 Translational Research Informatics Center, Kobe, Japan

9 Department of Pathology, Shizuoka Children’s Hospital, Shizuoka, Japan

10 Department of Anatomic Pathology, Pathological Sciences, Graduate School of Medical Sciences, Kyushu University, Fukuoka, Japan

110Department of Pathology, Saitama Prefectural Children’s Medical Center, Saitama, Japan

12 Clinical Research Center, NHO Nagoya Medical Center, Aichi, Japan

13 Department of Pediatric Hematology/Oncology, Children’s Medical Center, Osaka City General Hospital, Osaka, Japan

14 Department of Pediatric Surgery, Faculty of Medicine, Kyushu University, Fukuoka, Japan

15 Department of Hematology/Oncology, Saitama Children's Medical Center, Saitama, Japan16 Department of Radiology, National Center for Child Health and Development (NCCHD), Tokyo, Japan

17 Department of Radiology, Dokkyo Medical University Saitama Medical Center, Saitama, Japan

18 Department of Pediatric Surgery, Dokkyo Medical University Saitama Medical Center, Saitama, Japan

19 Department of Otolaryngology, Head and Neck Surgery, Kameda Medical Center, Chiba, Japan

20 Department of Pediatric Surgery, Institute of Clinical Medicine, University of Tsukuba, Ibaraki, Japan

21 Department of Musculoskeletal Oncology, National Cancer Center Hospital, Tokyo, Japan122 Department of Pediatric Surgery, Keio University School of Medicine, Tokyo, Japan

23 Japan Rhabdomyosarcoma Study Group

24 Department of Clinical Trial Design and Management, Translational Research Center, Kyoto University Hospital, Kyoto, Japan

25 Health and Medical Innovation, Osaka Metropolitan University Graduate School of Medicine, Osaka, Japan.

26 Department of Health Policy and Management, Nippon Medical School

27 Department of Nursing, Doshisha Women’s College of Liberal Arts, Kyoto, Japan

**Corresponding author:** Hajime Hosoi and Mitsuru Miyachi, Department of Pediatrics, Graduate School of Medical Science, Kyoto Prefectural University of Medicine (KPUM), Kyoto Japan.

E-mail: [hhosoi@koto.kpu-m.ac.jp](mailto:hhosoi@koto.kpu-m.ac.jp), [mmiyachi@koto.kpu-m.ac.jp](mailto:mmiyachi@koto.kpu-m.ac.jp)

Tel: +81 75 251 5571

Fax: +81 75 252 1399

The Outline of the Treatment Protocols:

Subgroup A patients received eight cycles (24 weeks) of vincristine, dactinomycin, and cyclophosphamide 1.2 g/m2/cycle (VAC1.2) therapy (total cumulative doses: V = 12 mg/m2, A = 0.36 mg/kg, C = 9.6 g/m2; Supplementary Table 1). Subgroup B patients received eight cycles (24 weeks) of vincristine, dactinomycin, and cyclophosphamide 2.2 g/m2/cycle (VAC2.2) and six cycles (24 weeks) of vincristine and dactinomycin (VA) (total cumulative doses: V = 54 mg/m2, A = 0.72 mg/kg, C = 17.6 g/m2) (Supplementary Table 2).

Radiotherapy (RT) was initiated at week 3 in patients with residual microscopic or gross embryonal rhabdomyosarcoma (ERMS). Total doses were based on the extent of residual disease: 36 Gy, 41.4 Gy, 45 Gy, and 50.4 Gy for stage 1 group IIA, group IIB/IIC, group III orbit, and group III tumors, respectively. There were two exceptions to this. Subgroup B patients with tumors in the vulva, uterus, biliary tract, or superficial non-para-meningeal head/neck sites underwent delayed primary excision at week 12 to remove any gross residual tumors; RT was administered subsequently. Subgroup B patients with vaginal tumors received RT at week 12 if the regional lymph nodes were clinically involved (N1), but only at week 28 if they were not (N0). No RT was administered to patients with vaginal tumors with N0 and in patients where repeated biopsies showed no residual tumor by week 28 to preserve vaginal tissue and avoid RT.

Supplementary Table 1. LRA0401 treatment regimens for patients in subgroup A

| 0 | 1 | 2 | 3 | 4 | 5 | 6 | 7 | 8 | 9 | 10 | 11 |
| --- | --- | --- | --- | --- | --- | --- | --- | --- | --- | --- | --- |
| V | V | V | V | V | V | V | V | V |  |  |  |
| A |  |  | A |  |  | A* |  |  | A |  |  |
| C |  |  | C |  |  | C |  |  | C |  |  |

RT (if indicated)

| 12 | 13 | 14 | 15 | 16 | 17 | 18 | 19 | 20 | 21 | 22 | 23 |
| --- | --- | --- | --- | --- | --- | --- | --- | --- | --- | --- | --- |
| V | V | V | V | V | V | V | V | V |  |  |  |
| A |  |  | A |  |  | A |  |  | A |  |  |
| C |  |  | C |  |  | C |  |  | C |  |  |

* Dactinomycin omitted at week 6 in patients beginning RT at week 3

Supplementary Table 2. LRB0402 treatment regimens for patients in subgroup B

| 0 | 1 | 2 | 3 | 4 | 5 | 6 | 7 | 8 | 9 | 10 | 11 |
| --- | --- | --- | --- | --- | --- | --- | --- | --- | --- | --- | --- |
| V | V | V | V | V | V | V | V | V |  |  |  |
| A |  |  | A |  |  | A* |  |  | A |  |  |
| C |  |  | C |  |  | C |  |  | C |  |  |

RT (if indicated)

| 12 | 13 | 14 | 15 | 16 | 17 | 18 | 19 | 20 | 21 | 22 | 23 |
| --- | --- | --- | --- | --- | --- | --- | --- | --- | --- | --- | --- |
| V | V | V | V | V | V | V | V | V |  |  |  |
| A |  |  | A* |  |  | A |  |  | A |  |  |
| C  RT (if indicated) |  |  | C |  |  | C |  |  | C |  |  |

| 24 | 25 | 26 | 27 | 28 | 29 | 30 | 31 | 32 | 33 | 34 | 35 |
| --- | --- | --- | --- | --- | --- | --- | --- | --- | --- | --- | --- |
| V | V | V | V | V | V | V | V | V |  |  |  |
| A |  |  | A |  |  | A* |  |  | A* |  |  |

RT (if indicated)

| 36 | 37 | 38 | 39 | 40 | 41 | 42 | 43 | 44 | 45 | 46 | 47 |
| --- | --- | --- | --- | --- | --- | --- | --- | --- | --- | --- | --- |
| V | V | V | V | V | V | V | V | V |  |  |  |
| A |  |  | A |  |  | A |  |  | A |  |  |

*Dactinomycin omitted at week 6 in patients beginning RT at week 3, week 15 in patients beginning RT at week 12, and weeks 30 and 33 in patients beginning RT at week 28

Statistical analysis and data managementThe sample size calculation was based on the primary endpoint, PFS. Expected PFS was assumed to be 75%. In order to reject the null hypothesis of 3 years PFS rate of 60%, using the likelihood ratio test, 32 and 41 patients are required for LRA0401 and LRB0402, respectively. One side test with Type I error of 5% and 80% power was used to make the estimate.

The number of rhabdomyosarcoma patients newly registered with the Ministry of Health, Labor and Welfare, as a specified chronic childhood disease from 1998 to 2003 in Japan was 294 over the 4 years (average of 73.5 cases per year). In addition, the registration rate of the Osaka Prefecture Regional Childhood Cancer Registry, which is the local pediatric cancer registry with the highest registration rate in the country, was 74.6%. Therefore, approximately 100 rhabdomyosarcoma patients are diagnosed annually in Japan. According to our previous retrospective study [1], the proportion of the low-risk subset A group for LRA0401 trial in the overall rhabdomyosarcoma patients occurring in Japan was approximately 10% and that of the low-risk B group for LRB0402 trial was 11.5%.

Approximately 4 years was spent establishing the JRSG including a CPR system and data center. In 2004, we initiated a nationwide study of children with rhabdomyosarcoma, covering all tumor risk-groups in Japan. Initially, we struggled in organizing an efficient data center for the clinical studies in Japan. Hence, we tentatively started group studies with three independent data centers for three clinical studies for the four risk groups as JRS-I. The data from these two clinical studies, LRA0401 and LRB0402 of JRS-I, were managed by the Translational Research Informatics Center, Kobe. Subsequently, the data center at CCNHD took over most of the JRS-I data and collectively controlled all data from the second nationwide group study (JRS-II) for rhabdomyosarcoma patients in Japan.

We projected that the registration for LRA0401 and LRB0402 studies would last for 4 years. However, unfortunately, not all rhabdomyosarcoma patients in Japan were registered into our nationwide group studies. Therefore, in reality, we needed 6 years for adequate registration (from June 11, 2004, to June 4, 2010) for LRA0401 and 8 years (from June 18, 2004, to April 13, 2012) for LRB0402 to acquire approximately half of the targeted number for each study.
